# Supplementary material
Source: publisher figshare collection journal article supplement (https://acs.figshare.com/ndownloader/files/3965731)
Supplement: Supplementary file 1 [file 3965731]

## Effect of Polymer Chain Folding on the Transition from H- to J- Aggregate Behavior in P3HT Nanofibers

Mina Baghgar<sup>1</sup>, Joelle A. Labastide<sup>2</sup>, Felicia Bokel<sup>3a</sup>, Ryan C. Hayward<sup>3</sup>, Michael D. Barnes<sup>1,2\*</sup>

<sup>1</sup>Department of Physics, University of Massachusetts, 411 Hasbrouck Laboratory, North Pleasant Street, Amherst MA 01003

<sup>2</sup>Department of Chemistry, University of Massachusetts, 104 Lederle Graduate Research Tower, North Pleasant Street, Amherst MA 01003

<sup>3</sup>Department of Polymer Science and Engineering, University of Massachusetts, Silvio O. Conte National Center for Polymer Research, 120 Governors Drive, Amherst MA 01003

### Supporting Information

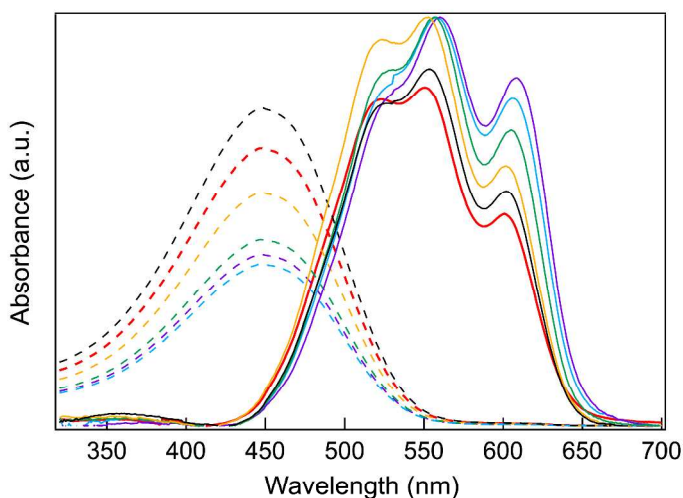

**Figure SI.1:** Amorphous (dashed line) and crystalline (solid line) components of suspension-phase absorption spectra of P3HT nanofibers with various molecular weights: 10 kDa (black), 13kDa (red), 23 kDa (yellow), 32 kDa (green), 48 kDa (blue), and 65 kDa (purple). The reduced contribution of amorphous absorption at high molecular weight is due to a decrease in solubility with increasing molecular weight.

---

<sup>a</sup> Author's current address: Materials Science and Engineering Division, National Institute of Standards and Technology, Gaithersburg, MD 20899
